# Supplementary material for: Placental, Foetal, and Maternal Serum Metabolomic Profiles in Pregnancy-Associated Cancer: Walker-256 Tumour Model in a Time-Course Analysis
Source: MDPI journal article supplement (doi:10.3390/ijms241713026), 2023-08-22
Supplement: s1 [file s1]

**Supplementary Table S1.** Maternal and tumour morphometric data for experimental groups, healthy (C) and tumour-bearing (W) dams at three different gestational periods, 12-, 16- and 19-days post-conception. Data presented as mean + standard deviation. Number of animals per group, (12 dpc  $n = 8$ ; 16 dpc  $n = 6$ ; 19 dpc  $n = 8$ ); W, (12 dpc  $n = 10$ ; 16 dpc  $n = 7$ ; 19 dpc  $n = 8$ ). a,  $p < 0.05$  compared to 12 dpc in the same group; \*  $p < 0.05$  compared to group C group in the same gestation period.

|                     | 12 dpc         | 16 dpc         | 19 dpc         | 12 dpc         | 16 dpc         | 19 dpc         |
|---------------------|----------------|----------------|----------------|----------------|----------------|----------------|
| Maternal weight (g) | 305.80 ± 18.27 | 336.75 ± 29.35 | 333.99 ± 20.06 | 296.02 ± 40.79 | 317.81 ± 34.68 | 336.24 ± 62.44 |
| Tumour weight (g)   | -              | -              | -              | 16.57 ± 6.24   | 22.72 ± 5.57   | 28.86 ± 11.35a |
| Carcass weight (g)  | 247.13 ± 20.80 | 253.53 ± 23.22 | 235.60 ± 19.19 | 204.22 ± 40.71 | 224.66 ± 38.57 | 216.59 ± 45.93 |
| Foetal resorption   | 0.5 ± 0.75     | 0.429 ± 0.535  | 0.375 ± 0.518  | 1.5 ± 1.0*     | 1.857 ± 1.574* | 0.875 ± 1.126  |
