# Supplementary material for: Placental, Foetal, and Maternal Serum Metabolomic Profiles in Pregnancy-Associated Cancer: Walker-256 Tumour Model in a Time-Course Analysis
Source: MDPI journal article supplement (doi:10.3390/ijms241713026), 2023-08-22
Supplement: s1 [file s1]

**Supplementary Table S5.** A time-course metabolites pathways along the health pregnancy at three different stages.

Legend: Health (C) group. Serum, Placenta, and Foetus impacted metabolic pathways.

 , enhanced;  decreased; —, unchanged metabolite. \*,  $p < 0.05$ ; \*\*,  $p < 0.01$ ; \*\*\*,  $p < 0.001$ ; \*\*\*\*,  $p < 0.0001$ .
