# Supplementary material for: Placental, Foetal, and Maternal Serum Metabolomic Profiles in Pregnancy-Associated Cancer: Walker-256 Tumour Model in a Time-Course Analysis
Source: MDPI journal article supplement (doi:10.3390/ijms241713026), 2023-08-22
Supplement: s1 [file s1]

**Supplementary Table S3.** Placenta metabolic profile for experimental groups, healthy (C) and tumour-bearing (W) dams at three different gestational periods, 12-, 16-, and 19-days post-conception. Results presented as mean (mM) + standard deviation. Number of animals per group, C (12 dpc,  $n = 6$ ; 16 dpc  $n = 6$ ; 19 dpc  $n = 7$ ); W (12 dpc  $n = 6$ ; 16 dpc  $n = 8$ ; 19 dpc  $n = 7$ ). a,  $p < 0.05$  compared to group C group at 12 dpc; b,  $p < 0.05$  compared to group C group at 16 dpc; \*  $p < 0.05$  compared to group C group in the same gestation period.

|                       | C              |                            |                              | W                           |                             |                             |
|-----------------------|----------------|----------------------------|------------------------------|-----------------------------|-----------------------------|-----------------------------|
|                       | 12 dpc         | 16 dpc                     | 19 dpc                       | 12 dpc                      | 16 dpc                      | 19 dpc                      |
| 3-Hydroxybutyrate     | 0.199 ± 0.037  | 0.146 ± 0.092              | 0.110 ± 0.034                | 0.143 ± 0.063               | 0.392 ± 0.598               | 0.113 ± 0.036               |
| 3-Hydroxyisobutyrate  | 0.076 ± 0.011  | 0.097 ± 0.014              | 0.095 ± 0.011                | 0.077 ± 0.008               | 0.084 ± 0.021               | 0.089 ± 0.008               |
| 3-Hydroxyisovalerate  | 0.156 ± 0.058  | 0.076 ± 0.049              | 0.078 ± 0.062                | 0.031 ± 0.029               | 0.018 ± 0.005               | 0.014 ± 0.001               |
| ADP                   | 0.084 ± 0.022  | 0.085 ± 0.039              | 0.064 ± 0.052                | 0.054 ± 0.035               | 0.064 ± 0.038               | 0.055 ± 0.042               |
| AMP                   | 0.135 ± 0.048  | 0.143 ± 0.047              | 0.073 ± 0.052                | 0.101 ± 0.033               | 0.156 ± 0.067               | 0.137 ± 0.078               |
| ATP                   | 0.043 ± 0.014  | 0.046 ± 0.018              | 0.041 ± 0.018                | 0.038 ± 0.014               | 0.053 ± 0.017               | 0.055 ± 0.016               |
| Acetate               | 0.876 ± 0.216  | 0.611 ± 0.328 <sup>a</sup> | 0.487 ± 0.293 <sup>a</sup>   | 0.504 ± 0.124 <sup>*</sup>  | 0.335 ± 0.230               | 0.323 ± 0.107 <sup>*</sup>  |
| Adenine               | 0.854±0.121    | 0.766 ± 0.177              | 0.822 ± 0.379                | 0.557 ± 0.195               | 0.584 ± 0.087               | 0.581 ± 0.109               |
| Adenosine             | 0.066 ± 0.031  | 0.061 ± 0.024              | 0.052 ± 0.036 <sup>b</sup>   | 0.027 ± 0.006               | 0.033 ± 0.013               | 0.031 ± 0.013               |
| Alanine               | 3.572 ± 0.214  | 3.412 ± 0.329              | 3.812 ± 0.396 <sup>b</sup>   | 3.833 ± 0.231               | 4.086 ± 0.457               | 4.380 ± 0.479 <sup>*</sup>  |
| Asparagine            | 0.779 ± 0.201  | 0.746 ± 0.176              | 0.740 ± 0.181                | 0.631 ± 0.091               | 0.600 ± 0.082               | 0.726 ± 0.096               |
| Aspartate             | 3.413 ± 1.351  | 3.208 ± 0.960              | 2.417 ± 0.515                | 3.326 ± 1.068               | 2.587 ± 0.854               | 2.136 ± 0.822               |
| Betaine               | 11.699 ± 1.719 | 12.209 ± 2.488             | 11.412 ± 2.817               | 10.458 ± 1.035              | 11.627 ± 2.669              | 10.432 ± 1.666              |
| Carnitine             | 0.846 ± 0.116  | 0.811 ± 0.126              | 0.851 ± 0.150                | 0.709 ± 0.156               | 0.760 ± 0.131               | 0.873 ± 0.082               |
| Choline               | 1.247 ± 0.181  | 1.127 ± 0.178              | 1.572 ± 0.440 <sup>a.b</sup> | 0.985 ± 0.235               | 0.907 ± 0.126               | 0.907 ± 0.105 <sup>*</sup>  |
| Creatine              | 5.447 ± 1.740  | 2.157 ± 0.504 <sup>a</sup> | 1.561 ± 0.568 <sup>a</sup>   | 3.784 ± 0.603 <sup>*</sup>  | 2.562 ± 0.334               | 2.858 ± 0.462 <sup>*</sup>  |
| Cytidine              | 0.126 ± 0.058  | 0.074 ± 0.058 <sup>a</sup> | 0.028 ± 0.013 <sup>a.b</sup> | 0.029 ± 0.016 <sup>*</sup>  | 0.024 ± 0.011 <sup>*</sup>  | 0.030 ± 0.016               |
| Ethanolamine          | 1.078 ± 0.227  | 1.130 ± 0.477              | 1.434 ± 0.562                | 0.788 ± 0.094               | 0.748 ± 0.104               | 0.850 ± 0.175               |
| Formate               | 0.460 ± 0.189  | 0.340 ± 0.178              | 0.398 ± 0.381                | 0.486 ± 0.371               | 0.257 ± 0.144               | 0.270 ± 0.132               |
| Fumarate              | 0.113 ± 0.029  | 0.064 ± 0.019 <sup>a</sup> | 0.061 ± 0.025 <sup>a</sup>   | 0.045 ± 0.018 <sup>*</sup>  | 0.045 ± 0.005 <sup>*</sup>  | 0.044 ± 0.008               |
| GTP                   | 0.054 ± 0.022  | 0.040 ± 0.019 <sup>a</sup> | 0.038 ± 0.020 <sup>b</sup>   | 0.024 ± 0.008 <sup>*</sup>  | 0.031 ± 0.014               | 0.023 ± 0.010 <sup>*</sup>  |
| Glucose               | 0.917 ± 0.348  | 1.384 ± 0.617 <sup>a</sup> | 1.906 ± 1.033 <sup>a</sup>   | 0.799 ± 0.371               | 0.695 ± 0.156 <sup>*</sup>  | 0.779 ± 0.183 <sup>*</sup>  |
| Glucose-6-phosphate   | 0.921 ± 0.488  | 1.504 ± 0.836              | 1.516 ± 0.712                | 1.084 ± 0.974               | 1.033 ± 0.300               | 0.819 ± 0.575               |
| Glutamate             | 5.590 ± 0.852  | 5.954 ± 1.049              | 6.111 ± 0.801 <sup>a</sup>   | 5.108 ± 0.537               | 5.918 ± 0.768               | 5.601 ± 0.241               |
| Glutamine             | 2.156 ± 0.132  | 2.309 ± 0.501 <sup>a</sup> | 2.736 ± 0.463 <sup>a</sup>   | 1.435 ± 0.220 <sup>*</sup>  | 2.075 ± 0.289 <sup>*</sup>  | 2.195 ± 0.277 <sup>*</sup>  |
| Glutathione           | 0.249 ± 0.141  | 0.423 ± 0.295              | 0.404 ± 0.319                | 0.117 ± 0.119               | 0.163 ± 0.200               | 0.125 ± 0.073               |
| Glycine               | 2.476 ± 0.374  | 2.271 ± 0.397              | 2.247 ± 0.465                | 2.320 ± 0.718               | 2.021 ± 0.281               | 1.972 ± 0.358               |
| Guanidoacetate        | 2.191 ± 0.820  | 1.246 ± 0.904 <sup>a</sup> | 0.777 ± 0.320 <sup>a</sup>   | 1.025 ± 0.263 <sup>*</sup>  | 0.888 ± 0.170               | 0.813 ± 0.184               |
| Guanosine             | 0.078 ± 0.035  | 0.135 ± 0.050              | 0.125 ± 0.058                | 0.070 ± 0.025               | 0.105 ± 0.020               | 0.108 ± 0.039               |
| Histamine             | 0.148 ± 0.140  | 0.090 ± 0.109 <sup>a</sup> | 0.048 ± 0.047 <sup>a</sup>   | 0.049 ± 0.020 <sup>*</sup>  | 0.059 ± 0.013               | 0.070 ± 0.033               |
| Histidine             | 0.079 ± 0.069  | 0.047 ± 0.036              | 0.032 ± 0.014                | 0.052 ± 0.029               | 0.042 ± 0.010               | 0.032 ± 0.014               |
| IMP                   | 0.067 ± 0.026  | 0.078 ± 0.042              | 0.069 ± 0.030                | 0.053 ± 0.050               | 0.061 ± 0.017               | 0.043 ± 0.018               |
| Inosine               | 0.996 ± 0.166  | 1.189 ± 0.222 <sup>a</sup> | 1.130 ± 0.220 <sup>a</sup>   | 0.735 ± 0.228 <sup>*</sup>  | 1.051 ± 0.102 <sup>*</sup>  | 0.919 ± 0.154 <sup>*</sup>  |
| Isoleucine            | 0.500 ± 0.031  | 0.426 ± 0.051 <sup>a</sup> | 0.421 ± 0.079 <sup>a.b</sup> | 0.430 ± 0.026 <sup>*</sup>  | 0.377 ± 0.031 <sup>*</sup>  | 0.434 ± 0.014 <sup>*</sup>  |
| Lactate               | 27.101 ± 2.077 | 28.524 ± 3.778             | 28.864 ± 2.995               | 36.414 ± 5.930 <sup>*</sup> | 34.809 ± 2.025 <sup>*</sup> | 36.021 ± 1.580 <sup>*</sup> |
| Leucine               | 1.104 ± 0.125  | 0.912 ± 0.233 <sup>a</sup> | 0.913 ± 0.199 <sup>a</sup>   | 0.885 ± 0.042 <sup>*</sup>  | 0.803 ± 0.096               | 0.924 ± 0.051               |
| Lysine                | 1.517 ± 0.302  | 1.914 ± 0.299 <sup>a</sup> | 1.866 ± 0.436 <sup>b</sup>   | 1.624 ± 0.234               | 1.963 ± 0.319               | 1.964 ± 0.256               |
| Methionine            | 0.413 ± 0.016  | 0.332 ± 0.132              | 0.317 ± 0.178                | 0.252 ± 0.120 <sup>*</sup>  | 0.201 ± 0.068 <sup>*</sup>  | 0.175 ± 0.046 <sup>*</sup>  |
| NAD+                  | 0.043 ± 0.008  | 0.102 ± 0.054 <sup>a</sup> | 0.075 ± 0.067                | 0.064 ± 0.046               | 0.139 ± 0.028               | 0.094 ± 0.022               |
| Nicotinurate          | 0.269 ± 0.056  | 0.227 ± 0.046 <sup>a</sup> | 0.234 ± 0.078                | 0.183 ± 0.048 <sup>*</sup>  | 0.153 ± 0.017 <sup>*</sup>  | 0.167 ± 0.025 <sup>*</sup>  |
| O-Phosphocholine      | 1.150 ± 0.181  | 0.995 ± 0.222              | 1.018 ± 0.239                | 1.291 ± 0.224               | 0.941 ± 0.131               | 1.040 ± 0.138               |
| O-Phosphoethanolamine | 3.475 ± 0.496  | 3.629 ± 0.562              | 3.532 ± 1.050                | 3.165 ± 0.371               | 3.933 ± 0.421               | 3.732 ± 0.338               |
| Pantothenate          | 0.169 ± 0.032  | 0.154 ± 0.043              | 0.123 ± 0.048 <sup>a</sup>   | 0.089 ± 0.024 <sup>*</sup>  | 0.139 ± 0.022               | 0.155 ± 0.050 <sup>*</sup>  |
| Phenylalanine         | 0.554 ± 0.027  | 0.521 ± 0.097              | 0.488 ± 0.088 <sup>a</sup>   | 0.514 ± 0.027               | 0.419 ± 0.049 <sup>*</sup>  | 0.476 ± 0.037               |
| Proline               | 1.613 ± 0.161  | 1.611 ± 0.242              | 1.419 ± 0.157b               | 1.356 ± 0.396 <sup>*</sup>  | 1.397 ± 0.161 <sup>*</sup>  | 1.399 ± 0.187               |
| Pyruvate              | 0.132 ± 0.024  | 0.101 ± 0.043 <sup>a</sup> | 0.076 ± 0.020 <sup>a</sup>   | 0.078 ± 0.047 <sup>*</sup>  | 0.079 ± 0.023               | 0.056 ± 0.006 <sup>*</sup>  |
| Serine                | 1.880 ± 0.479  | 2.229 ± 0.718              | 2.323 ± 0.477 <sup>a</sup>   | 1.409 ± 0.266               | 1.577 ± 0.182 <sup>*</sup>  | 1.585 ± 0.295 <sup>*</sup>  |
| Succinate             | 0.575 ± 0.089  | 0.616 ± 0.107              | 0.498 ± 0.128                | 0.737 ± 0.194 <sup>*</sup>  | 0.760 ± 0.098 <sup>*</sup>  | 0.697 ± 0.079 <sup>*</sup>  |
| Taurine               | 5.449 ± 0.410  | 6.486 ± 0.610 <sup>a</sup> | 7.363 ± 1.171 <sup>a</sup>   | 5.235 ± 0.452               | 6.398 ± 0.917               | 6.555 ± 0.895               |
| Threonine             | 1.330 ± 0.222  | 1.578 ± 0.371 <sup>a</sup> | 1.911 ± 0.525 <sup>a</sup>   | 1.149 ± 0.183               | 1.082 ± 0.259 <sup>*</sup>  | 1.169 ± 0.102 <sup>*</sup>  |
| Tryptophan            | 0.215 ± 0.054  | 0.191 ± 0.070 <sup>a</sup> | 0.155 ± 0.029 <sup>a</sup>   | 0.166 ± 0.031 <sup>*</sup>  | 0.113 ± 0.020 <sup>*</sup>  | 0.130 ± 0.029 <sup>*</sup>  |
| Tyrosine              | 0.517 ± 0.042  | 0.412 ± 0.078 <sup>a</sup> | 0.411 ± 0.121 <sup>a</sup>   | 0.432 ± 0.072 <sup>*</sup>  | 0.303 ± 0.047 <sup>*</sup>  | 0.376 ± 0.064               |
| UDP-glucose           | 0.210 ± 0.062  | 0.284 ± 0.121              | 0.198 ± 0.141                | 0.252 ± 0.060               | 0.276 ± 0.055               | 0.257 ± 0.066               |
| UMP                   | 0.153 ± 0.048  | 0.138 ± 0.077              | 0.097 ± 0.077                | 0.087 ± 0.016               | 0.126 ± 0.041               | 0.085 ± 0.023               |
| Uracil                | 0.451 ± 0.096  | 0.400 ± 0.115              | 0.466 ± 0.254                | 0.451 ± 0.113               | 0.353 ± 0.059               | 0.353 ± 0.024               |
| Uridine               | 0.658 ± 0.093  | 0.441 ± 0.191 <sup>a</sup> | 0.353 ± 0.093 <sup>a</sup>   | 0.292 ± 0.159 <sup>*</sup>  | 0.264 ± 0.075               | 0.285 ± 0.073               |
| Valine                | 1.078 ± 0.130  | 0.906 ± 0.120 <sup>a</sup> | 0.902 ± 0.138 <sup>a</sup>   | 0.863 ± 0.055 <sup>*</sup>  | 0.746 ± 0.103 <sup>*</sup>  | 0.855 ± 0.046               |
| myo-Inositol          | 1.986 ± 0.652  | 2.183 ± 0.494              | 2.033 ± 0.438                | 2.589 ± 0.329               | 2.341 ± 0.298               | 2.347 ± 0.123               |
| 1-Methylhistidine     | 0.181 ± 0.030  | 0.259 ± 0.104 <sup>a</sup> | 0.210 ± 0.047 <sup>b</sup>   | 0.302 ± 0.022 <sup>*</sup>  | 0.224 ± 0.029 <sup>*</sup>  | 0.234 ± 0.033 <sup>*</sup>  |
