# Supplementary material for: Placental, Foetal, and Maternal Serum Metabolomic Profiles in Pregnancy-Associated Cancer: Walker-256 Tumour Model in a Time-Course Analysis
Source: MDPI journal article supplement (doi:10.3390/ijms241713026), 2023-08-22
Supplement: s1 [file s1]

**Supplementary Table S2.** Maternal serum metabolic profile for experimental groups, healthy (C) and tumour-bearing (W) pregnancy at three different gestational periods 12-, 16-, and 19-days post-conception.. Results presented as mean (mM) + standard deviation. Number of animals per group: C (12 dpc, n = 6; 16 dpc n = 5; 19 dpc n = 6); W, (12 dpc n = 7; 16 dpc n = 6; 19 dpc n = 6).  
a,  $p < 0.05$  compared to group C group at 12 dpc; b,  $p < 0.05$  compared to group C group at 16 dpc; \*  $p < 0.05$  compared to group C group in the same gestation period.

|                     | C              |                             |                              | W                          |                             |                            |
|---------------------|----------------|-----------------------------|------------------------------|----------------------------|-----------------------------|----------------------------|
|                     | 12 dpc         | 16 dpc                      | 19 dpc                       | 12 dpc                     | 16 dpc                      | 19 dpc                     |
| 2-Aminobutyrate     | 0.004 ± 0.001  | 0.003 ± 0.001               | 0.004 ± 0.001                | 0.004 ± 0.002              | 0.014 ± 0.006 <sup>*</sup>  | 0.009 ± 0.002 <sup>*</sup> |
| Acetate             | 0.119 ± 0.015  | 0.072 ± 0.002 <sup>a</sup>  | 0.061 ± 0.007 <sup>a</sup>   | 0.081 ± 0.040 <sup>*</sup> | 0.053 ± 0.018               | 0.043 ± 0.014              |
| Acetone             | 0.011 ± 0.002  | 0.009 ± 0.0002              | 0.007 ± 0.0002               | 0.009 ± 0.002              | 0.183 ± 0.109 <sup>*</sup>  | 0.017 ± 0.005              |
| Alanine             | 0.262 ± 0.026  | 0.201 ± 0.003 <sup>a</sup>  | 0.199 ± 0.008 <sup>a</sup>   | 0.312 ± 0.058              | 0.514 ± 0.079 <sup>*</sup>  | 0.370 ± 0.023 <sup>*</sup> |
| Arginine            | 0.121 ± 0.028  | 0.090 ± 0.008 <sup>a</sup>  | 0.084 ± 0.014 <sup>a</sup>   | 0.092 ± 0.017 <sup>*</sup> | 0.061 ± 0.027               | 0.090 ± 0.039              |
| Asparagine          | 0.026 ± 0.003  | 0.020 ± 0.003 <sup>a</sup>  | 0.020 ± 0.004 <sup>a</sup>   | 0.021 ± 0.003 <sup>*</sup> | 0.032 ± 0.005 <sup>*</sup>  | 0.029 ± 0.003 <sup>*</sup> |
| Aspartate           | 0.032 ± 0.003  | 0.016 ± 0.003 <sup>a</sup>  | 0.019 ± 0.004 <sup>a</sup>   | 0.023 ± 0.005 <sup>*</sup> | 0.024 ± 0.004 <sup>*</sup>  | 0.014 ± 0.004 <sup>*</sup> |
| Betaine             | 0.121 ± 0.013  | 0.059 ± 0.002 <sup>a</sup>  | 0.041 ± 0.002 <sup>a</sup>   | 0.095 ± 0.010              | 0.109 ± 0.047 <sup>*</sup>  | 0.046 ± 0.004              |
| Carnitine           | 0.017 ± 0.004  | 0.014 ± 0.0005 <sup>a</sup> | 0.010 ± 0.001 <sup>a,b</sup> | 0.019 ± 0.001              | 0.020 ± 0.003 <sup>*</sup>  | 0.013 ± 0.001 <sup>*</sup> |
| Choline             | 0.020 ± 0.004  | 0.013 ± 0.0005 <sup>a</sup> | 0.012 ± 0.001 <sup>a</sup>   | 0.019 ± 0.009              | 0.029 ± 0.009 <sup>*</sup>  | 0.015 ± 0.003              |
| Creatine            | 0.176 ± 0.042  | 0.095 ± 0.002 <sup>a</sup>  | 0.108 ± 0.013 <sup>a</sup>   | 0.197 ± 0.057              | 0.307 ± 0.083 <sup>*</sup>  | 0.117 ± 0.043              |
| Creatine phosphate  | 0.021 ± 0.012  | 0.012 ± 0.002               | 0.018 ± 0.006                | 0.018 ± 0.005              | 0.017 ± 0.005               | 0.017 ± 0.004              |
| Creatinine          | 0.014 ± 0.005  | 0.010 ± 0.001               | 0.010 ± 0.002                | 0.017 ± 0.003              | 0.033 ± 0.008               | 0.012 ± 0.002              |
| Cytidine            | 0.009 ± 0.003  | 0.005 ± 0.001 <sup>a</sup>  | 0.005 ± 0.001 <sup>a</sup>   | 0.008 ± 0.002              | 0.012 ± 0.002 <sup>*</sup>  | 0.006 ± 0.001              |
| Dimethyl sulfone    | 0.011 ± 0.001  | 0.004 ± 0.0001 <sup>a</sup> | 0.007 ± 0.001 <sup>a,b</sup> | 0.008 ± 0.002 <sup>*</sup> | 0.005 ± 0.002               | 0.006 ± 0.001              |
| Ethanolamine        | 0.038 ± 0.008  | 0.021 ± 0.002 <sup>a</sup>  | 0.024 ± 0.006 <sup>a</sup>   | 0.033 ± 0.006              | 0.043 ± 0.003 <sup>*</sup>  | 0.026 ± 0.008              |
| Formate             | 0.027 ± 0.006  | 0.019 ± 0.0005 <sup>a</sup> | 0.018 ± 0.001 <sup>a</sup>   | 0.028 ± 0.005              | 0.022 ± 0.007               | 0.026 ± 0.005              |
| Fumarate            | 0.003 ± 0.001  | 0.001 ± 0.0002 <sup>a</sup> | 0.002 ± 0.0001 <sup>b</sup>  | 0.003 ± 0.001              | 0.003 ± 0.0005 <sup>*</sup> | 0.002 ± 0.001              |
| Glucose             | 2.382 ± 0.186  | 1.485 ± 0.039 <sup>a</sup>  | 1.247 ± 0.336 <sup>a</sup>   | 1.883 ± 0.528              | 1.112 ± 0.518               | 1.527 ± 0.153              |
| Glutamate           | 0.119 ± 0.017  | 0.081 ± 0.008 <sup>a</sup>  | 0.073 ± 0.010 <sup>a</sup>   | 0.111 ± 0.023              | 0.100 ± 0.018               | 0.081 ± 0.009              |
| Glutamine           | 0.269 ± 0.042  | 0.204 ± 0.007 <sup>a</sup>  | 0.194 ± 0.014 <sup>a</sup>   | 0.195 ± 0.009 <sup>*</sup> | 0.162 ± 0.082               | 0.208 ± 0.029              |
| Glycerol            | 0.285 ± 0.070  | 0.268 ± 0.010               | 0.295 ± 0.015                | 0.305 ± 0.081              | 0.370 ± 0.096               | 0.348 ± 0.014              |
| Glycine             | 0.132 ± 0.018  | 0.057 ± 0.001 <sup>a</sup>  | 0.054 ± 0.004 <sup>a</sup>   | 0.089 ± 0.013 <sup>*</sup> | 0.181 ± 0.043 <sup>*</sup>  | 0.072 ± 0.017              |
| Guanidoacetate      | 0.016 ± 0.004  | 0.013 ± 0.001               | 0.016 ± 0.003                | 0.014 ± 0.006              | 0.017 ± 0.004               | 0.017 ± 0.002              |
| Histamine           | 0.008 ± 0.004  | 0.004 ± 0.001 <sup>a</sup>  | 0.005 ± 0.001 <sup>a</sup>   | 0.006 ± 0.001              | 0.009 ± 0.003 <sup>*</sup>  | 0.007 ± 0.003              |
| Histidine           | 0.008 ± 0.002  | 0.004 ± 0.001 <sup>a</sup>  | 0.005 ± 0.001 <sup>a</sup>   | 0.005 ± 0.001 <sup>*</sup> | 0.006 ± 0.002 <sup>*</sup>  | 0.005 ± 0.001              |
| Isoleucine          | 0.051 ± 0.007  | 0.034 ± 0.001 <sup>a</sup>  | 0.030 ± 0.003 <sup>a</sup>   | 0.043 ± 0.004 <sup>*</sup> | 0.057 ± 0.007 <sup>*</sup>  | 0.044 ± 0.010 <sup>*</sup> |
| Lactate             | 7.028 ± 2.324  | 3.683 ± 0.030 <sup>a</sup>  | 4.442 ± 1.145 <sup>a</sup>   | 6.541 ± 1.654              | 8.936 ± 1.838 <sup>*</sup>  | 5.492 ± 1.826              |
| Leucine             | 0.085 ± 0.012  | 0.058 ± 0.003 <sup>a</sup>  | 0.048 ± 0.010 <sup>a</sup>   | 0.067 ± 0.008 <sup>*</sup> | 0.102 ± 0.004 <sup>*</sup>  | 0.067 ± 0.011 <sup>*</sup> |
| Lysine              | 0.258 ± 0.043  | 0.212 ± 0.014               | 0.200 ± 0.029 <sup>a</sup>   | 0.246 ± 0.042              | 0.279 ± 0.063 <sup>*</sup>  | 0.263 ± 0.060 <sup>*</sup> |
| Methionine          | 0.042 ± 0.008  | 0.030 ± 0.002 <sup>a</sup>  | 0.029 ± 0.006 <sup>a</sup>   | 0.036 ± 0.006              | 0.041 ± 0.006 <sup>*</sup>  | 0.032 ± 0.007              |
| Methylsuccinate     | 0.017 ± 0.004  | 0.015 ± 0.0005              | 0.013 ± 0.001                | 0.018 ± 0.006              | 0.034 ± 0.007 <sup>*</sup>  | 0.023 ± 0.002 <sup>*</sup> |
| N,N-Dimethylglycine | 0.008 ± 0.002  | 0.005 ± 0.0005 <sup>a</sup> | 0.005 ± 0.001 <sup>a</sup>   | 0.009 ± 0.001              | 0.013 ± 0.002 <sup>*</sup>  | 0.008 ± 0.002 <sup>*</sup> |
| O-Phosphocholine    | 0.001 ± 0.0005 | 0.001 ± 0.0001              | 0.002 ± 0.0001               | 0.001 ± 0.001              | 0.005 ± 0.002 <sup>*</sup>  | 0.002 ± 0.001              |
| Ornithine           | 0.035 ± 0.016  | 0.013 ± 0.001 <sup>a</sup>  | 0.017 ± 0.005 <sup>a</sup>   | 0.033 ± 0.015              | 0.050 ± 0.012 <sup>*</sup>  | 0.031 ± 0.010 <sup>*</sup> |
| Pantothenate        | 0.004 ± 0.001  | 0.004 ± 0.0002              | 0.004 ± 0.001                | 0.005 ± 0.001              | 0.009 ± 0.003 <sup>*</sup>  | 0.006 ± 0.002              |
| Phenylalanine       | 0.041 ± 0.005  | 0.028 ± 0.001 <sup>a</sup>  | 0.030 ± 0.002 <sup>a</sup>   | 0.040 ± 0.004              | 0.060 ± 0.009 <sup>*</sup>  | 0.039 ± 0.004 <sup>*</sup> |
| Proline             | 0.092 ± 0.013  | 0.069 ± 0.003 <sup>a</sup>  | 0.052 ± 0.011 <sup>a,b</sup> | 0.073 ± 0.019 <sup>*</sup> | 0.105 ± 0.014 <sup>*</sup>  | 0.076 ± 0.013 <sup>*</sup> |
| Pyruvate            | 0.072 ± 0.006  | 0.044 ± 0.001 <sup>a</sup>  | 0.030 ± 0.002 <sup>a</sup>   | 0.091 ± 0.038              | 0.140 ± 0.027 <sup>*</sup>  | 0.076 ± 0.024 <sup>*</sup> |
| Serine              | 0.120 ± 0.018  | 0.066 ± 0.004 <sup>a</sup>  | 0.058 ± 0.008 <sup>a</sup>   | 0.093 ± 0.008 <sup>*</sup> | 0.072 ± 0.019               | 0.079 ± 0.014 <sup>*</sup> |
| Succinate           | 0.070 ± 0.029  | 0.037 ± 0.0005              | 0.054 ± 0.027                | 0.083 ± 0.054              | 0.143 ± 0.016               | 0.066 ± 0.042              |
| Taurine             | 0.297 ± 0.037  | 0.163 ± 0.005 <sup>a</sup>  | 0.177 ± 0.043 <sup>a</sup>   | 0.223 ± 0.037 <sup>*</sup> | 0.351 ± 0.085 <sup>*</sup>  | 0.158 ± 0.060              |
| Threonine           | 0.129 ± 0.022  | 0.120 ± 0.006               | 0.117 ± 0.009                | 0.148 ± 0.025              | 0.126 ± 0.036               | 0.157 ± 0.041              |
| Tryptophan          | 0.003 ± 0.001  | 0.002 ± 0.001               | 0.005 ± 0.001                | 0.014 ± 0.014 <sup>*</sup> | 0.016 ± 0.006 <sup>*</sup>  | 0.015 ± 0.004 <sup>*</sup> |
| Tyrosine            | 0.050 ± 0.012  | 0.026 ± 0.002 <sup>a</sup>  | 0.023 ± 0.004 <sup>a</sup>   | 0.036 ± 0.006 <sup>*</sup> | 0.068 ± 0.015 <sup>*</sup>  | 0.031 ± 0.005              |
| Uracil              | 0.008 ± 0.002  | 0.006 ± 0.001               | 0.008 ± 0.002                | 0.015 ± 0.005 <sup>*</sup> | 0.026 ± 0.004 <sup>*</sup>  | 0.012 ± 0.005              |
| Urea                | 0.590 ± 0.095  | 0.391 ± 0.058 <sup>a</sup>  | 0.400 ± 0.040 <sup>a</sup>   | 0.525 ± 0.059              | 1.026 ± 0.223 <sup>*</sup>  | 0.608 ± 0.056 <sup>*</sup> |
| Uridine             | 0.005 ± 0.001  | 0.003 ± 0.0005 <sup>a</sup> | 0.003 ± 0.001 <sup>a</sup>   | 0.003 ± 0.002              | 0.006 ± 0.003 <sup>*</sup>  | 0.003 ± 0.0001             |
| Valine              | 0.105 ± 0.018  | 0.075 ± 0.001 <sup>a</sup>  | 0.064 ± 0.012 <sup>a</sup>   | 0.086 ± 0.010 <sup>*</sup> | 0.119 ± 0.013 <sup>*</sup>  | 0.090 ± 0.019 <sup>*</sup> |
| myo-Inositol        | 0.078 ± 0.017  | 0.050 ± 0.004               | 0.061 ± 0.006                | 0.089 ± 0.020              | 0.167 ± 0.064 <sup>*</sup>  | 0.072 ± 0.010              |
| 1-Methylhistidine   | 0.033 ± 0.006  | 0.021 ± 0.002 <sup>a</sup>  | 0.016 ± 0.003 <sup>a,b</sup> | 0.023 ± 0.002 <sup>*</sup> | 0.042 ± 0.005 <sup>*</sup>  | 0.026 ± 0.004 <sup>*</sup> |
