# Supplementary material for: Placental, Foetal, and Maternal Serum Metabolomic Profiles in Pregnancy-Associated Cancer: Walker-256 Tumour Model in a Time-Course Analysis
Source: Int J Mol Sci. 2023 Aug 22;24(17):13026. doi: 10.3390/ijms241713026 (PMC10487647; doi:10.3390/ijms241713026)
Supplement: Supplementary file 1 [file ijms-24-13026-s001.zip]

Archive with 6 entries (6 files):
- Supplementary Figures.pdf
- Supplementary Table S1 - Maternal morphometric parameters.pdf
- Supplementary Table S2 - Maternal serum metabolic profile.pdf
- Supplementary Table S3 - Placental metabolic profile.pdf
- Supplementary Table S4 - Foetal metabolic profile.pdf
- Supplementary Table S5 - A time course metabolic pathway - Serum, placenta and foetus.pdf
